# Supplementary material for: Topical application of insulin encapsulated by chitosan-modified PLGA nanoparticles to alleviate alkali burn-induced corneal neovascularization
Source: Royal Society of Chemistry journal article supplement (doi:10.1039/d4nr05507a), 2025-01-01

# **Topical application of insulin encapsulated by chitosan-modified PLGA nanoparticles to alleviate alkali burn-induced corneal neovascularization**

Yuqing Zhang,<sup>#a,b,c</sup> Yangrui Du,<sup>#a</sup> Sijie Zhou,<sup>a</sup> Zeqi Liu,<sup>a</sup> Pan Li<sup>b</sup> and Zhiyu Du<sup>\*a</sup>

<sup>a</sup>Department of Ophthalmology, the Second Affiliated Hospital of Chongqing Medical University, Chongqing 400010, China

<sup>b</sup>Chongqing Key Laboratory of Ultrasound Molecular Imaging, Institute of Ultrasound Imaging, the Second Affiliated Hospital of Chongqing Medical University, Chongqing 400010, China

<sup>c</sup>State Key Laboratory of Ultrasound in Medicine and Engineering, Chongqing Medical University, Chongqing 400010, China

<sup>#</sup>These authors contributed equally to this work.

**\*Correspondence:** Zhiyu Du (Email: 300074@hospital.cqmu.edu.cn),  
Department of Ophthalmology, The Second Affiliated Hospital of Chongqing Medical University, Chongqing 400010, China.

## List of Supplementary Figures

Supplementary Figure1.

Supplementary Figure2.

Supplementary Figure3.

**Supplementary information Figure 1**

Evaluation of CRNV induced by alkali burn treated with different concentrations of CPI NPs. (A) 14 days after alkali burn modeling, different concentrations of CPI NPs were dropped (three times a day), and the corneal opacity and corneal neovascularity were evaluated by slit-lamp examination and fluorescein sodium staining. (B) Corneal opacity score after 14 days of treatment with different concentrations of CPI NPs. (C) CRNV area ratio after 14 days of treatment with different concentrations of CPI NPs

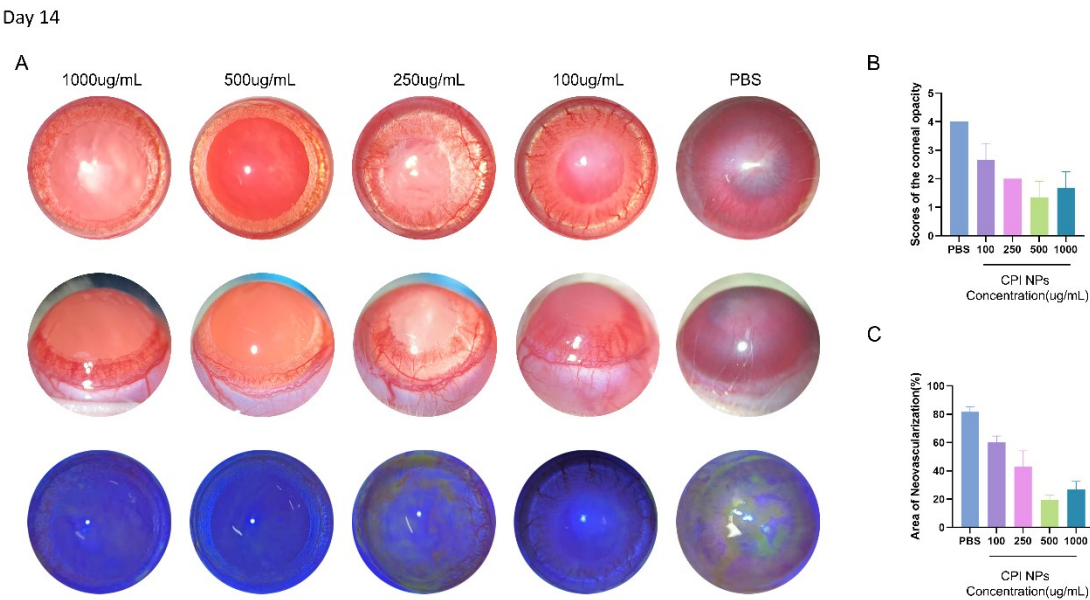

## Supplementary information Figure 2

Degradation of CPI NPs in PBS (pH 7.4).

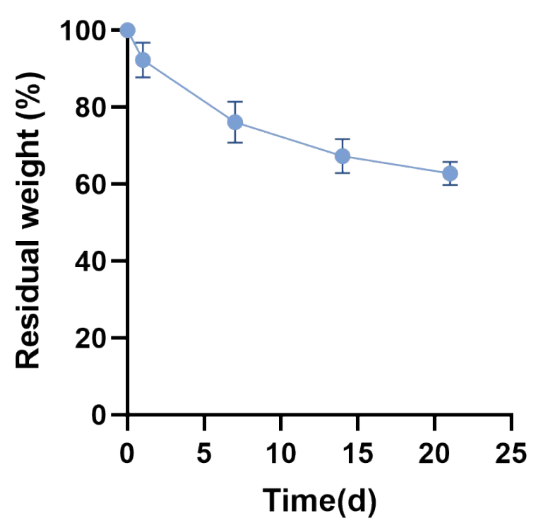

### Supplementary information Figure 3

Studies on circulation of CPI NPs in rats

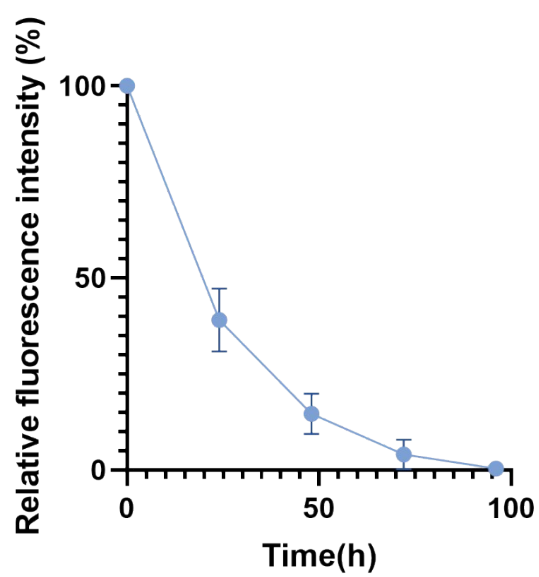

Supplement: d4nr05507a4.pdf [file d4nr05507a4.pdf]
